# Supplementary material for: Accessibility and quality of haemodialysis services in an urban setting in South India: a qualitative multiperspective study
Source: PubMed Central journal article supplement — BMJ Open. 2022 Feb 7;12(2):e052525. doi: 10.1136/bmjopen-2021-052525 (PMC8823140; doi:10.1136/bmjopen-2021-052525), 2022-02-07
Supplement: bmjopen-2021-052525supp001.pdf [file bmjopen-2021-052525supp001.pdf]

| <b>Dialysis Centre details</b>                         | <b>Total number of centres</b> |
|--------------------------------------------------------|--------------------------------|
| <b>Type of ownership</b>                               |                                |
| Govt                                                   | 3                              |
| Private (Individual)                                   | 8                              |
| Private (corporate)                                    | 6                              |
| NGO/trust                                              | 3                              |
| <b>No of dialysis machines</b>                         |                                |
| <5                                                     | 2                              |
| 6-10                                                   | 11                             |
| 11-20                                                  | 5                              |
| >20                                                    | 2                              |
| <b>No of shifts per day</b>                            |                                |
| Two                                                    | 2                              |
| Three                                                  | 12                             |
| Four                                                   | 4                              |
| <b>No of working days per week</b>                     |                                |
| Six days                                               | 16                             |
| Seven days                                             | 4                              |
| <b>Total number of Staff (including support staff)</b> |                                |
| 1-5                                                    | 2                              |
| 6-10                                                   | 10                             |
| 11-15                                                  | 4                              |
| 16-20                                                  | 4                              |
| <b>Other facilities available</b>                      |                                |
| Pharmacy                                               | 12                             |
| Laboratory                                             | 9                              |
| Canteen                                                | 6                              |
| <b>Services provided</b>                               |                                |
| Haemodialysis                                          | 20                             |
| Peritoneal dialysis                                    | 0                              |
| Transplant                                             | 1                              |
| Diet counselling                                       | 3                              |
| Psychological counselling                              | 0                              |
| Home visits                                            | 0                              |
